# Supplementary material for: The Rlm13 Gene, a New Player of Brassica napus–Leptosphaeria maculans Interaction Maps on Chromosome C03 in Canola
Source: Front Plant Sci. 2021 May 12;12:654604. doi: 10.3389/fpls.2021.654604 (PMC8150007; doi:10.3389/fpls.2021.654604)
Supplement: Supplementary file 4 [file Table_4.xlsx]

## Sheet: Associations with 60K SNPs
Supplementary Table 4: Genome-wide association for resistance to L. maculans isolate PHW1223, causing blackleg disease in B. napus. Association analysis between Illumina 60K SNP markers and disease scores was performed using the SVS Package. Only top 50 marker-trait associations are shown herein.
SNP Marker	Chromosome	Physical localisation of SNP marker on Darmor genome assembly version 4.1	Regression P value	Regression -log10 P	Regression Odds Ratio	Regression Full Scan Perm. P
Bn-scaff_15877_1-p719944	C03	4417337	5.98839e-21	20.2227	7.61498e-18	0.001
Bn-scaff_21778_1-p75811	C03	4880249	4.44456e-14	13.3522	0.0149724	0.001
Bn-scaff_21778_1-p77298	C03	4883484	4.44456e-14	13.3522	0.0149724	0.001
Bn-scaff_21778_1-p78638	C03	4884823	4.44456e-14	13.3522	0.0149724	0.001
Bn-scaff_21778_1-p80189	C03	4886412	7.27089e-14	13.1384	0.015552	0.001
Bn-scaff_21778_1-p76142	C03	4880580	9.02599e-14	13.0445	0.015021	0.001
Bn-scaff_21778_1-p177121	C03	4977418	2.10795e-13	12.6761	0.0178573	0.001
Bn-scaff_21778_1-p222672	C03	5019141	2.10795e-13	12.6761	0.0178573	0.001
Bn-scaff_21778_1-p223740	C03	5020192	2.10795e-13	12.6761	0.0178573	0.001
Bn-scaff_21778_1-p236913	C03	5027249	2.10795e-13	12.6761	0.0178573	0.001
Bn-scaff_21778_1-p262139	C03	5054038	2.10795e-13	12.6761	0.0178573	0.001
Bn-scaff_21778_1-p269638	C03	5063837	2.10795e-13	12.6761	0.0178573	0.001
Bn-scaff_21778_1-p269753	C03	5063952	2.10795e-13	12.6761	0.0178573	0.001
Bn-scaff_21778_1-p287068	C03	5079887	2.10795e-13	12.6761	0.0178573	0.001
Bn-scaff_21778_1-p319366	C03	5099999	2.10795e-13	12.6761	0.0178573	0.001
Bn-scaff_21778_1-p326121	C03	5106718	2.10795e-13	12.6761	0.0178573	0.001
Bn-scaff_21778_1-p307709	C03	3766814	2.67584e-13	12.5725	0.017295	0.001
Bn-scaff_21778_1-p137658	C03	4941845	4.27768e-13	12.3688	0.017933	0.001
Bn-scaff_21778_1-p345454	C03	5124136	8.93847e-13	12.0487	0.0208516	0.001
Bn-scaff_21778_1-p356034	C03	5144257	8.93847e-13	12.0487	0.0208516	0.001
Bn-scaff_21778_1-p363171	C03	5154006	8.93847e-13	12.0487	0.0208516	0.001
Bn-scaff_21778_1-p382522	C03	5167300	8.93847e-13	12.0487	0.0208516	0.001
Bn-scaff_22728_1-p1397089	C03	5260972	8.93847e-13	12.0487	0.0208516	0.001
Bn-scaff_22728_1-p1397093	C03	5260968	8.93847e-13	12.0487	0.0208516	0.001
Bn-scaff_22728_1-p1397271	C03	5260790	8.93847e-13	12.0487	0.0208516	0.001
Bn-scaff_22728_1-p1398002	C03	5252648	8.93847e-13	12.0487	0.0208516	0.001
Bn-scaff_22728_1-p1398447	C03	5251427	8.93847e-13	12.0487	0.0208516	0.001
Bn-scaff_22728_1-p1398713	C03	5251161	8.93847e-13	12.0487	0.0208516	0.001
Bn-scaff_22728_1-p1399205	C03	5250671	8.93847e-13	12.0487	0.0208516	0.001
Bn-scaff_22728_1-p1399313	C03	5250562	8.93847e-13	12.0487	0.0208516	0.001
Bn-scaff_22728_1-p1402061	C03	5247819	8.93847e-13	12.0487	0.0208516	0.001
Bn-scaff_22728_1-p1402207	C03	5247673	8.93847e-13	12.0487	0.0208516	0.001
Bn-scaff_22728_1-p1405849	C03	5245146	8.93847e-13	12.0487	0.0208516	0.001
Bn-scaff_22728_1-p1397147	C03	5260914	1.81215e-12	11.7418	0.0209635	0.001
Bn-scaff_22728_1-p1397539	C03	5258180	1.81215e-12	11.7418	0.0209635	0.001
Bn-scaff_22728_1-p1397458	C03	5258261	1.81215e-12	11.7418	0.0209635	0.001
Bn-scaff_22728_1-p1397442	C03	5258277	3.72818e-12	11.4285	0.0210775	0.001
Bn-scaff_21778_1-p364556	C03	5155387	3.9495e-12	11.4035	0.0191635	0.001
Bn-scaff_25739_1-p2613	C03	5117627	3.70037e-11	10.4318	0.0258051	0.001
Bn-scaff_22728_1-p968837	C03	5706737	8.19588e-11	10.0864	0.0307701	0.001
Bn-scaff_22728_1-p1141914	C03	5530190	1.15869e-10	9.93603	0.0415476	0.001
Bn-scaff_22728_1-p1143469	C03	5528622	1.15869e-10	9.93603	0.0415476	0.001
Bn-scaff_22728_1-p1185330	C03	5479710	1.15869e-10	9.93603	0.0415476	0.001
Bn-scaff_22728_1-p1197316	C03	5466253	1.15869e-10	9.93603	0.0415476	0.001
Bn-scaff_22728_1-p1197524	C03	5466045	1.15869e-10	9.93603	0.0415476	0.001
Bn-scaff_22728_1-p1248875	C03	5453674	1.15869e-10	9.93603	0.0415476	0.001
Bn-scaff_22728_1-p1249980	C03	5452575	1.15869e-10	9.93603	0.0415476	0.001
Bn-scaff_22728_1-p1256248	C03	5446684	1.15869e-10	9.93603	0.0415476	0.001
Bn-scaff_22728_1-p1256416	C03	5446516	1.15869e-10	9.93603	0.0415476	0.001
Bn-scaff_22728_1-p1258206	C03	5444754	1.15869e-10	9.93603	0.0415476	0.001

## Sheet: Haplotype associations-DArTseq
Supplementary Table 4: Genome-wide association for resistance to L. maculation isolate PHW1223, causing blackleg disease in B. napus. Haplotyping analysis between DArTseq markers and disease scores was performed using the SVS Package. Only top 50 marker-trait associations are shown.
First Marker	Chromosome	Position	Haploblock #	DArTseq Markers Used	Haplotype	Chi-Squared P	Chi-Squared -log10 P
4120432	C3	3849507	518	4120432, 4119383	AA	7.2e-58	57.1427
3160484	C3	1776390	509	3160484, 4121621	AA	9.6e-55	54.0178
4120379	C3	1075835	507	4120379, 5859470	AA	2.18e-54	53.6621
4121333	C3	2629621	514	4121333, 4121479, 4121863	AAA	2.94e-54	53.532
4119725	C3	2074777	510	4119725, 5591775	AA	1.81e-53	52.743
4119447	C3	3240695	517	4119447, 26680289, 4120411, 4121790, 4120522	AAAAA	1.05e-52	51.977
4119947	C3	350499	504	4119947, 4120079	AA	1.81e-52	51.7419
4119802	C3	2779741	515	4119802, 26680294, 4121344	AAA	3.63e-51	50.4402
4120131	C3	807390	506	4120131, 4121413, 4120299, 3166958, 4120550	AAAAA	4.46e-49	48.3505
4119867	C3	1470368	508	4119867, 4120369, 4120165, 4119344, 4121576, 5855306, 26680204	AAAAAAA	1.56e-48	47.8074
4120105	C3	2303134	513	4120105, 4120526, 4119877, 5591699, 4120444	AAAAA	1.24e-45	44.9079
4119882	C3	41452	503	4119882, 4120543, 4120547, 5591717, 5833657, 5591796, 4120727	AAAAAAA	2.92e-45	44.5347
26680172	C3	2886772	516	26680172, 44647441, 26680221, 4120849, 4120142, 4120685, 4120215	AAAAAAA	6.95e-43	42.158
3090543	A10	8160608	407	3090543, 4112572, 4109409	ABB	3.99e-05	4.39877
3136714	A1	18174618	43	3136714, 3112330, 3128113	BAA	0.000726309	3.13888
4706174	C4	38554844	596	4706174, 5707833, 3193986, 4117162, 3090582, 3100871, 3082139	BBBBABB	0.000779357	3.10826
5030423	A2	4941903	71	5030423, 3083107	AB	0.000831554	3.08011
3078800	C6	19944846	640	3078800, 3078074	BA	0.000887686	3.05174
3090177	A3	12440753	116	3090177, 5708033	AB	0.000887686	3.05174
3115700	A4	15941675	151	3115700, 4111343, 3159196, 4112501, 4111111	BABBB	0.000927149	3.03285
5121974	A6	15300783	271	5121974, 3142385, 5048795	BAB	0.000965571	3.01522
3108052	C3	22423803	541	3108052, 3164776	BA	0.00122909	2.91042
5052229	C7	38541129	704	5052229, 4110385	BA	0.00126962	2.89633
3078135	A1	5180571	17	3078135, 4167704	AB	0.00126962	2.89633
3086902	A6	12449949	259	3086902, 3112265	BA	0.0013388	2.87328
4107263	C4	39039392	597	4107263, 3101658, 4107526	ABA	0.00140426	2.85255
3131399	A5	2270052	170	3131399, 3084716	BA	0.00145249	2.83789
3138990	A6	3180075	223	3138990, 5031314, 3088693, 4167170, 3093619	BABAA	0.00157072	2.8039
3162198	A6	13045019	261	3162198, 3135853	AB	0.00176735	2.75268
4114651	A8	17920453	334	4114651, 4116423	AB	0.00182823	2.73797
3166062	A9	15226544	366	3166062, 3089499, 5122610, 3135290, 3095736	BAAAA	0.00291349	2.53559
3154455	A3	9645413	112	3154455, 3149789, 3100660	ABB	0.00325966	2.48683
4108613	A6	7657788	248	4108613, 4336621|F|0-15:C>G-15:C>G	AA	0.00568053	2.24561
3121019	C2	3665459	462	3121019, 3177039, 3144234, 3144107, 3077899, 4106991, 3187883, 4112648, 3097065, 3136694, 3092834, 3082299, 3079096, 3089184, 3151658	BABBBAAAABBAAAB	0.0256433	1.59103
4120432	C3	3849507	518	4120432, 4119383	BB	1.23e-54	53.9085
4120379	C3	1075835	507	4120379, 5859470	BB	2.18e-54	53.6621
4121333	C3	2629621	514	4121333, 4121479, 4121863	BBB	2.94e-54	53.532
3160484	C3	1776390	509	3160484, 4121621	BB	1.07e-51	50.972
4119802	C3	2779741	515	4119802, 26680294, 4121344	BBB	3.63e-51	50.4402
4119725	C3	2074777	510	4119725, 5591775	BB	1.65e-50	49.7814
4119947	C3	350499	504	4119947, 4120079	BB	1.28e-49	48.8921
4119447	C3	3240695	517	4119447, 26680289, 4120411, 4121790, 4120522	BBBBB	1.75e-49	48.7573
4120131	C3	807390	506	4120131, 4121413, 4120299, 3166958, 4120550	BBBBB	4.46e-49	48.3505
4119867	C3	1470368	508	4119867, 4120369, 4120165, 4119344, 4121576, 5855306, 26680204	BBBBBBB	1.74e-45	44.7592
4119882	C3	41452	503	4119882, 4120543, 4120547, 5591717, 5833657, 5591796, 4120727	BBBBBBB	2.92e-45	44.5347
26680172	C3	2886772	516	26680172, 44647441, 26680221, 4120849, 4120142, 4120685, 4120215	BBBBBBB	6.95e-43	42.158
4120105	C3	2303134	513	4120105, 4120526, 4119877, 5591699, 4120444	BBBBB	6.98e-43	42.156
3118732	C3	35796959	547	3118732, 3085205	AB	0.0136078	1.86621
4707144	A6	5023551	237	4707144, 3145739	AB	0.0251575	1.59933
3091524	C4	4071793	569	3091524, 3126388	AB	0.0289579	1.53823
