# Supplementary material for: The Rlm13 Gene, a New Player of Brassica napus–Leptosphaeria maculans Interaction Maps on Chromosome C03 in Canola
Source: Front Plant Sci. 2021 May 12;12:654604. doi: 10.3389/fpls.2021.654604 (PMC8150007; doi:10.3389/fpls.2021.654604)
Supplement: Supplementary file 6 [file Table_6.xlsx]

## Sheet: Sheet1
Supplementary Table 6. Synthetic genomic regions of B. rapa gene intervals located within the LepR4 gene (Yu et al. 2013) for resistance in B. napus
B. rapa	B. oleracea	Chromosome	Brassica napus
			Gene ID	Start (bp)	End (bp)
Bra017959	Bo8g078980	A06	BnaA06g15600D	8542833	8545862
		C08	BnaC08g21330D	23938794	23940960
Bra018037	Bo8g077270
		C08	BnaC08g20450D	23194178	23197472
Bra018198	Bo3g132890
		C03	BnaC03g56070D	45361849	45362475
Bra024309	Bo3g101190	A06	BnaA06g23540D	16334726	16337069
